# Supplementary material for: The Effect of the Lysine Acetylation Modification of ClpP on the Virulence of Vibrio alginolyticus
Source: MDPI journal article supplement (doi:10.3390/molecules29174278), 2024-09-09
Supplement: s1 [file s1]

**Table S1** Sequences of primers used in this study.

| Primers                 | Nucleotide sequence (5'-3')                 | references |
|-------------------------|---------------------------------------------|------------|
| <i>clpP</i> -F          | ATGAGCTACCAAGAAAAAATGCAA                    | This study |
| <i>clpP</i> -R          | TTACTCGCCACGGTGGCTTAACACT                   | This study |
| pET-28a- <i>clpP</i> -F | CGCGGATCCATGAGCTACCAAGAAAAA                 | This study |
| pET-28a- <i>clpP</i> -R | CCGCTCGAGCTCGCCACGGTGGCTTAA                 | This study |
| pET-28a-YZ-F            | TGCTAGTTATTGCTCAGCGG                        | This study |
| pET-28a-YZ-R            | TAATACGACTCACTATAGGG                        | This study |
| <i>clpP</i> -com-F      | agtggatccccgggctgcagACCAGAACTAAACGACGAGTTCG | This study |
| <i>clpP</i> -com-R      | ggtaccgggccccccctcgagCCAAATGCGCTGGCTAATT    | This study |
| pBBR1-YZ-F              | ggatcttcagagatATGTGCTGCAAGGCGATTAAG         | This study |
| pBBR1-YZ-R              | ctgccgttcgacgatTGACCATGATTACGCCAAGCG        | This study |
| K165Q- <i>clpP</i> -F   | CcagTTGTTAGCAGAACATACAGGCCAACCTC            | This study |
| K165Q- <i>clpP</i> -R   | GTTCTGCTAACAActgGTTTAGCTTCTGTTTAATCGTCAGGA  | This study |
| K165R- <i>clpP</i> -F   | CaggTTGTTAGCAGAACATACAGGCCAACCTC            | This study |
| K165R- <i>clpP</i> -R   | GTTCTGCTAACAAcctGTTTAGCTTCTGTTTAATCGTCAGGA  | This study |
| K165A- <i>clpP</i> -F   | GCTAAACgcgTTGTTAGCAGAACATACAGGCCA           | This study |
| K165A- <i>clpP</i> -R   | CTAACAAcgcGTTTAGCTTCTGTTTAATCGTCAGGA        | This study |
